# Supplementary material for: Detecting haplotype-specific transcript variation in long reads with FLAIR2
Source: PubMed Central journal article supplement (PMC10312636; doi:10.1101/2023.06.09.544396), 2023-06-12
Supplement: NIHPP2023.06.09.544396v1-Supplement-5.pdf [file NIHPP2023.06.09.544396v1-Supplement-5.pdf]

# SFig 1

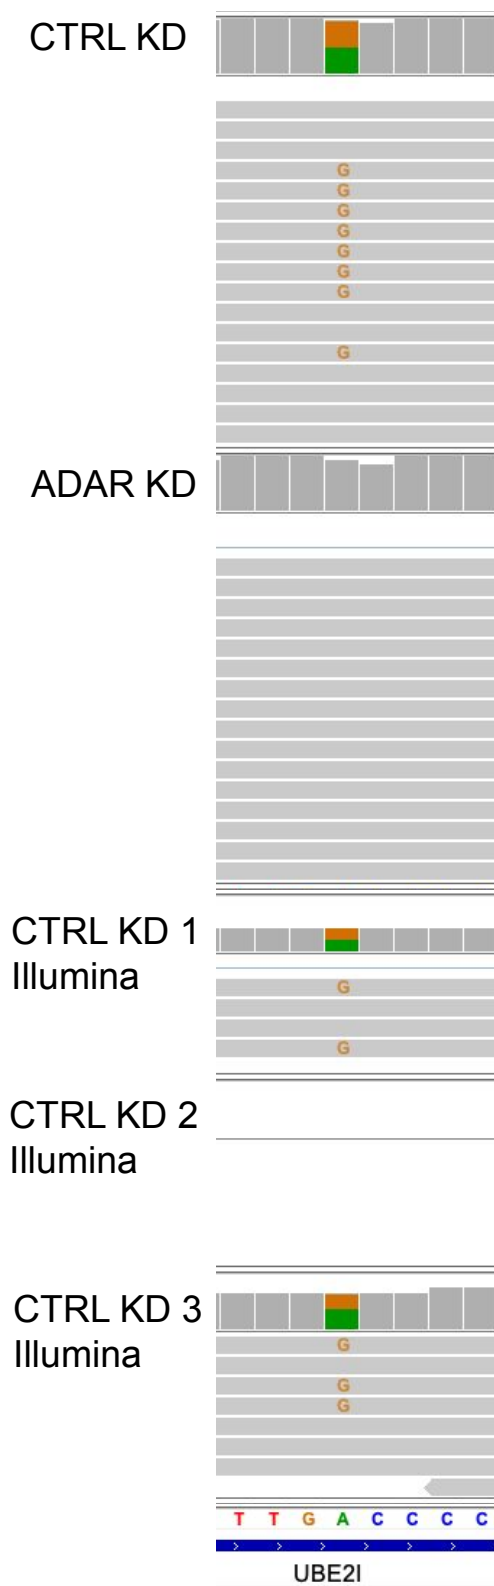

**Supplemental Figure 1 | Example of novel A-to-I editing found with nanopore data.** IGV shots of nanopore and Illumina data aligned to hg38. There were no reads aligning to *UBE2I* in the second Illumina CTRL KD replicate.

## Supplementary Table 2

| Gene Set Name                               | p-value  | FDR q-value |
|---------------------------------------------|----------|-------------|
| DNA metabolic process                       | 2.75E-13 | 4.27E-09    |
| DNA repair                                  | 2.21E-11 | 1.72E-07    |
| Cellular response to DNA damage stimulus    | 1.80E-10 | 9.34E-07    |
| Cellular response to stress                 | 3.39E-10 | 1.32E-06    |
| Chromosome                                  | 1.45E-09 | 4.49E-06    |
| Cell cycle                                  | 3.27E-09 | 8.47E-06    |
| Transferase complex                         | 7.38E-09 | 1.62E-05    |
| Catalytic complex                           | 8.34E-09 | 1.62E-05    |
| Small molecule metabolic process            | 6.89E-08 | 1.19E-04    |
| Cellular macromolecule biosynthetic process | 1.72E-07 | 2.67E-04    |

bioRxiv preprint doi: <https://doi.org/10.1101/2023.06.09.544396>; this version posted June 12, 2023. The copyright holder for this preprint (which was not certified by peer review) is the author/funder, who has granted bioRxiv a license to display the preprint in perpetuity. It is made available under aCC-BY 4.0 International license.

**Supplementary Table 2 | GO terms associated with haplotype-specific transcripts found in hybrid castaneus x 129 mouse data.**
